# Supplementary material for: The Abnormal Accumulation of Lipopolysaccharide Secreted by Enriched Gram-Negative Bacteria Increases the Risk of Rotavirus Colonization in Young Adults
Source: MDPI journal article supplement (doi:10.3390/microorganisms11092280), 2023-09-11
Supplement: s1 [file s1]

**Table S1.** Baseline characteristics of Participants

|        | Gender %<br><br>(Prevalence) | Age (year)<br><br>(mean ± SD) | BMI kg/cm <sup>2</sup><br><br>(mean ± SD) | Positive rate (%)<br><br>(Prevalence) |
|--------|------------------------------|-------------------------------|-------------------------------------------|---------------------------------------|
| Male   | 53.3% (160/300)              | 20.6 ± 0.8                    | 20.2 ± 2.4                                | 13.8% (22/160)                        |
| Female | 46.7% (140/300)              | 21.2 ± 0.5                    | 22.3 ± 3.2                                | 10.7% (15/140)                        |
| Total  | 100% (60/60)                 | 21.6 ± 0.8                    | 21.4 ± 2.7                                | 12.3% (37/300)                        |
