# Supplementary material for: The Abnormal Accumulation of Lipopolysaccharide Secreted by Enriched Gram-Negative Bacteria Increases the Risk of Rotavirus Colonization in Young Adults
Source: MDPI journal article supplement (doi:10.3390/microorganisms11092280), 2023-09-11
Supplement: s1 [file s1]

**Protocol of real-time PCR to detect HRV**

RNA was extracted from stool sample using Mag-MK Virus RNA Extraction Kit (Sangon, Shanghai, China), followed by using MightyScript First Strand cDNA Synthesis Master Mix (Sangon, Shanghai, China) to synthesize the first-strand cDNA as template. The volume of qPCR reaction was 30  $\mu$ L, with the following ingredients: 0.3  $\mu$ L of each primer (10  $\mu$ M), 0.2  $\mu$ L of TaqMan probe (10  $\mu$ M), 1  $\mu$ L of template, 10  $\mu$ L of TaqProbe qPCR-Multiplex Mastermix (Sangon, Shanghai, China), and the remaining volume with nuclease-free water. The amplification on Roche LightCycler 96 Instrument (Roche Life Science, Basel, Switzerland), with the following program: 95 °C for 10 m, following by 45 cycles of 95 °C for 10 s, 59 °C for 10 s, and 72 °C for 20 s. Fluorescence signals were detected at the end of each cycle of the extension step.

**The sequence of the primers**

Forward primer: 5'-ACRTRACCCTCTATGAGCACA-3'

Reverse primer: 5'-GGTCACATAACGCCCCTATA-3'

Probe: ROX-AGTTAAAAGCTAACACTGTCAAAAACCTAA-BHQ2\*
