# Supplementary material for: The Abnormal Accumulation of Lipopolysaccharide Secreted by Enriched Gram-Negative Bacteria Increases the Risk of Rotavirus Colonization in Young Adults
Source: MDPI journal article supplement (doi:10.3390/microorganisms11092280), 2023-09-11
Supplement: s1 [file s1]

Table S2: Adjusted ORs (95% CI) for HRV colonization according to quartiles of exposure for urine antibiotics in single-antibiotic model

|      | Quartile<br>1                        | Quartile 2    | Quartile 3           | Quartile 4       | <i>p</i><br>trend    |
|------|--------------------------------------|---------------|----------------------|------------------|----------------------|
| PVAs | <b>Tetracycline hydrochloride</b>    |               |                      |                  |                      |
|      | Range                                | < 0.39        | 0.39~0.45            | 0.46~0.64        | ≥0.65                |
|      | Mode 1                               | 1.00<br>(ref) | 1.00(0.00~∞)         | 3.23E(0.00~∞)    | 2.61E(0.00~∞)        |
|      |                                      |               |                      |                  | 0.022                |
|      | <b>Doxycycline hydrochloride</b>     |               |                      |                  |                      |
|      | Range                                | < 0.32        | 0.33~0.56            | 0.57~0.62        | ≥0.63                |
|      | Mode 1                               | 1.00<br>(ref) | 0.00(0.00~∞)         | 0.00(0.00~∞)     | 0.00(0.00~∞)         |
|      |                                      |               |                      |                  | 0.022                |
|      | <b>Oxytetracycline hydrochloride</b> |               |                      |                  |                      |
|      | Range                                | < 0.92        | 0.92~1.00            | 1.01~1.08        | ≥1.09                |
|      | Mode 1                               | 1.00<br>(ref) | 2.00<br>(0.05~78.25) | 0.00(0.00~∞)     | 0.50<br>(0.01~19.56) |
|      |                                      |               |                      |                  | 0.384                |
|      | <b>Sulfametoxydiazine</b>            |               |                      |                  |                      |
|      | Range                                | < 1.2         | 1.30~1.51            | 1.52~1.68        | ≥1.69                |
|      | Mode 1                               | 1.00<br>(ref) | 0.00(0.00~∞)         | 0.00(0.00~∞)     | 0.00(0.00~∞)         |
|      |                                      |               |                      |                  |                      |
|      | <b>Norfloxacin</b>                   |               |                      |                  |                      |
|      | Range                                | < 0.74        | 0.75~0.83            | 0.83~0.90        | ≥0.91                |
|      | Mode 1                               | 1.00<br>(ref) | 0.00(0.00~∞)         | 0.00(0.00~∞)     | 0.00(0.00~∞)         |
|      |                                      |               |                      |                  | 0.103                |
|      | <b>Sulfamethoxazole</b>              |               |                      |                  |                      |
|      | Range                                | < 1.032       | 1.03~1.16            | 1.17~1.30        | ≥1.31                |
|      | Mode 1                               | 1.00<br>(ref) | 0.00(0.00~∞)         | 0.00(0.00~∞)     | 0.00(0.00~∞)         |
|      |                                      |               |                      |                  | 0.022                |
|      | <b>Ofloxacin</b>                     |               |                      |                  |                      |
|      | Range                                | < 0.91        | 0.91~1.00            | 1.01~1.08        | ≥1.09                |
|      | Mode 1                               | 1.00<br>(ref) | 2.00<br>(0.05~78.25) | 0.00(0.00~∞)     | 0.50<br>(0.01~19.56) |
|      |                                      |               |                      |                  | 0.384                |
|      | <b>Penicillin V</b>                  |               |                      |                  |                      |
|      | Range                                | < 0.00        | 0.00~0.00            | 0.00~5.01        | ≥5.02                |
|      | Mode 1                               | 1.00<br>(ref) | 0.41 (0.35~0.81)     | 0.73 (0.52~1.32) | 0.60<br>(0.45~1.07)  |
|      |                                      |               |                      |                  | 0.283                |
|      | <b>Lomefloxacin hydrochloride</b>    |               |                      |                  |                      |
|      | Range                                | < 0.91        | 0.00~0.00            | 0.00~8.15        | ≥8.16                |
|      | Mode 1                               | 1.00<br>(ref) | 1.26 (0.95~2.36)     | 0.48 (0.32~1.03) | 0.61<br>(0.38~1.05)  |
|      |                                      |               |                      |                  | 0.012                |

|     |                                    |               |                      |                  |                      |       |
|-----|------------------------------------|---------------|----------------------|------------------|----------------------|-------|
| VAs | <b>N4-acetylsulfamonomethoxine</b> |               |                      |                  |                      |       |
|     | Range                              | < 4.23        | 4.23~4.33            | 4.34~4.88        | ≥4.89                |       |
|     | Mode 1                             | 1.00<br>(ref) | 2.00<br>(0.05~78.25) | 0.00 (0.00~∞)    | 1.00<br>(0.03~50.40) | 0.251 |
|     | <b>Cefquinome sulfate</b>          |               |                      |                  |                      |       |
|     | Range                              | < 53.74       | 53.75~57.99          | 58.00~116.74     | ≥116.75              |       |
|     | Mode 1                             | 1.00<br>(ref) | 1.00(0.00~∞)         | 3.23E(0.00~∞)    | 2.61E(0.00~∞)        | 0.022 |
|     | <b>Ceftiofur</b>                   |               |                      |                  |                      |       |
|     | Range                              | < 0.14        | 0.15~0.28            | 0.29~2.35        | ≥2.36                |       |
|     | Mode 1                             | 1.00<br>(ref) | 1.00(0.00~∞)         | 3.23E(0.00~∞)    | 2.61E(0.00~∞)        | 0.022 |
|     | <b>Cyadox</b>                      |               |                      |                  |                      |       |
|     | Range                              | < 218.44      | 218.45~232.49        | 232.50~377.49    | ≥377.50              |       |
|     | Mode 1                             | 1.00<br>(ref) | 1.00(0.00~∞)         | 3.23E(0.00~∞)    | 2.61E(0.00~∞)        | 0.022 |
| HAs | <b>Levofloxacin</b>                |               |                      |                  |                      |       |
|     | Range                              | < 6.20        | 6.20~6.52            | 6.53~6.81        | ≥6.81                |       |
|     | Mode 1                             | 1.00<br>(ref) | 3.23(0.00~∞)         | 8.08(0.00~∞)     | 1.62E(0.00~∞)        | 0.384 |
|     | <b>Clarithromycin</b>              |               |                      |                  |                      |       |
|     | Range                              | < 0.91        | 0.91~0.93            | 0.94~0.95        | ≥0.96                |       |
|     | Mode 1                             | 1.00<br>(ref) | 0.50(0.01~19.56)     | 2.00(0.05~78.25) | 0.00(0.00~∞)         | 0.384 |

PVAs: preferred as veterinary antibiotics. VAs: veterinary antibiotics. HAs: human antibiotics.

Model 1: Elements were included in the conditional logistic regression models separately (single-antibiotic) and adjusted for age and gender.
