# Supplementary material for: The Abnormal Accumulation of Lipopolysaccharide Secreted by Enriched Gram-Negative Bacteria Increases the Risk of Rotavirus Colonization in Young Adults
Source: MDPI journal article supplement (doi:10.3390/microorganisms11092280), 2023-09-11
Supplement: s1 [file s1]

Table S3: Adjusted ORs (95% CI) for RV colonization according to quartiles of the relative abundance of bacterial taxon and LPS level in fecal samples

|                            |                    | Quartile 1 | Quartile 2       | Quartile 3       | Quartile 4       | <i>p</i> trend |
|----------------------------|--------------------|------------|------------------|------------------|------------------|----------------|
| <i>Enterococcus</i>        | Range (relative %) | < 2.97     | 2.97~3.89        | 3.90~11.94       | ≥ 11.95          | 0.0022         |
|                            | Model 1            | 1.00 (ref) | 2.45 (1.34-4.15) | 1.38 (1.26-3.42) | 2.78 (1.61-5.29) |                |
| <i>Enterococcaceae</i>     | Range (relative %) | < 6.47     | 6.48~7.09        | 7.10~7.32        | ≥ 7.33           | 0.499          |
|                            | Model 1            | 1.00 (ref) | 1.67 (1.00-3.21) | 2.73 (1.27-4.01) | 2.89 (1.62-5.34) |                |
| <i>Enterobacteriales</i>   | Range (relative %) | <11.54     | 11.55~12.14      | 12.15~13.49      | ≥ 13.50          | 0.028          |
|                            | Model 1            | 1.00 (ref) | 0.81 (0.56-1.24) | 0.85 (0.51-1.32) | 0.55 (0.35-0.94) |                |
| <i>Gammaproteobacteria</i> | Range (relative %) | <1.04      | 1.05~1.29        | 1.30~3.14        | ≥ 3.15           | <0.0001        |
|                            | Model 1            | 1.00 (ref) | 1.56 (0.95-2.79) | 2.51 (1.42-4.58) | 3.88 (2.47-6.29) |                |
| LPS                        | Range (EU/mL)      | <0.56      | 0.56-1.21        | 1.22-2.41        | ≥ 2.42           | <0.0001        |
|                            | Model 1            | 1.00 (ref) | 1.25 (0.62-2.15) | 1.41 (0.87-2.37) | 2.69 (1.52-4.59) |                |

Model 1: Elements were included in the conditional logistic regression models separately (single- the relative abundance of bacterial taxon/LPS level) and adjusted for age and gender.
